# Supplementary material
Source: PubMed Central journal article supplement (PMC3100617)

## Supplementary Figure 1

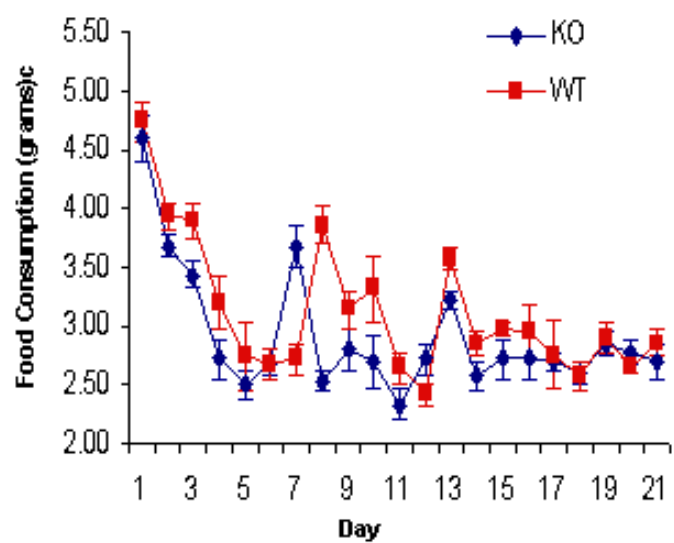

Supplement: supp_en.2010-1345_en-10-1345_Fig_1.pdf [file supp_en.2010-1345_en-10-1345_Fig_1.pdf]
